# Supplementary material for: Low-temperature synthesis of quantum size gadolinium monosulfide (GdS) nanoparticles and their pathogen capture efficiency
Source: Royal Society of Chemistry journal article supplement (doi:10.1039/c000553c), 2010-01-01
Supplement: c000553c.pdf [file c000553c.pdf]

†**Electronic Supplementary Information (ESI)**

**Low Temperature Synthesis of Quantum size-Gadolinium monosulfide (GdS) Nanoparticles and their Pathogen Capture efficiency**

**Vyom Parashar<sup>a\*</sup>, Shiv K. Pandey<sup>a</sup> and Avinash C. Pandey<sup>a</sup>**

**Experimental Details**

Dry powder sample of GdS was used for all the experimental investigations except for Transmission Electron Microscopy (TEM) analysis. Carbon coated copper grid (100 mesh) was prepared by solution-casting and air drying at room temperature. TEM was performed on FEI Tecnai G<sup>2</sup> 30 microscope. XRD of the powder sample were performed on Rigaku D/max-2200PC diffractometer operated at 40kV/20mA and 40 kV/40 mA, using CuK<sub>α1</sub> radiation. GdS nanoparticles were characterized by UV-Vis absorption (Perkin Elmer Lambda 35 spectrophotometer) and TGA/DSC (thermogravimetric analysis and differential scanning Calorimetric analysis) (Perkin Elmer Pyris Series-Diamond TGA/DTA). IR spectra were recorded with a Perkin Elmer FT-IR spectrometer. The GdS samples were dried, pressed into KBr pellets and measured. Room temperature magnetization measurement was carried out using a vibrating sample magnetometer (VSM, ADE Magnetics, USA) up to an applied field of 1.80 T with pressed pellets of prepared powdered samples.

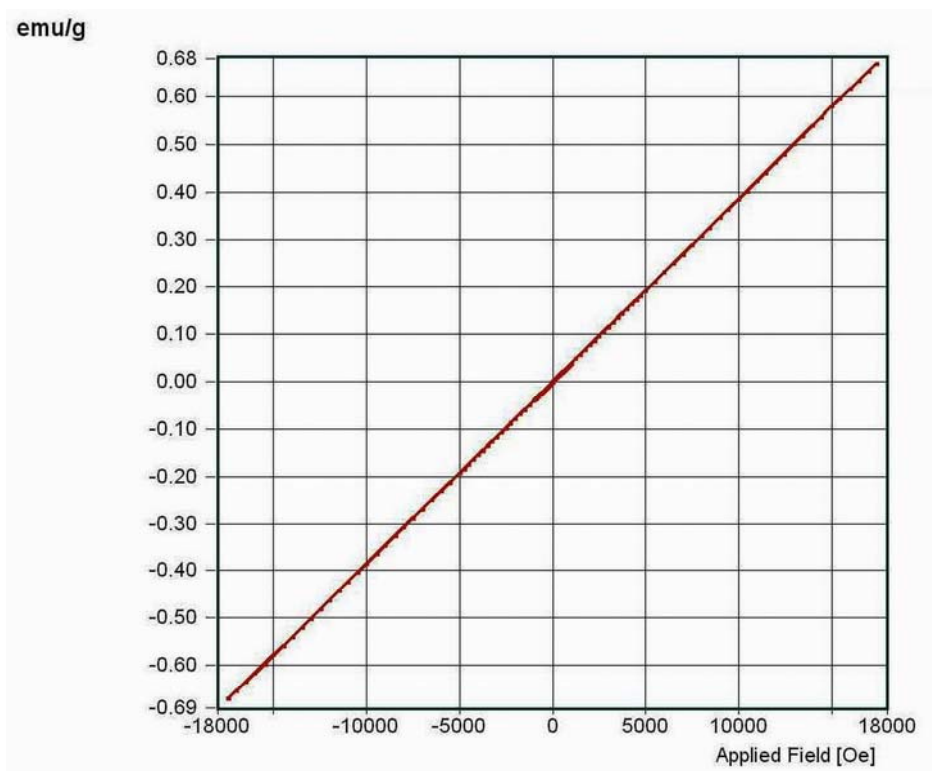

Fig. S1. .  $M-H$  curve ( $-1.8 \leq H \leq 1.8$  T) at temperatures ( $T$ ) 300 K of GdS nanoparticles

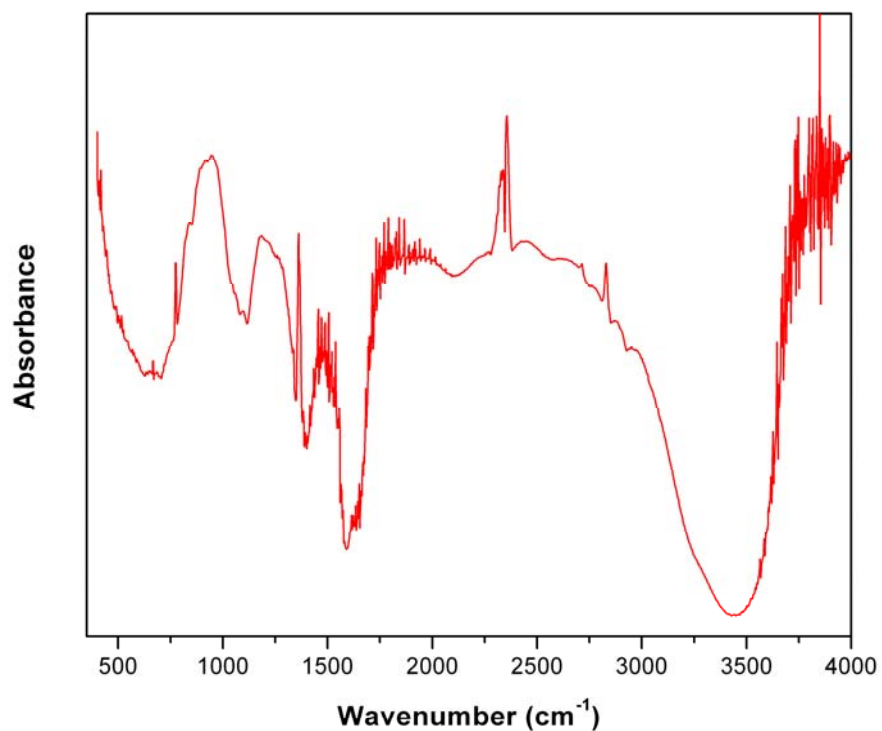

Fig. S2. FT-IR spectrum of dextrose capped GdS nanoparticles. Peaks assignments: From 600 to 1500  $\text{cm}^{-1}$  C-O and C-C groups vibration modes are present and the carbohydrates generally shows their characteristic bands. From 2900 to 3450  $\text{cm}^{-1}$  assigned to CH and OH vibrations groups.
